# Supplementary material for: Multi-scale dynamics of carbon dioxide flux and its environmental drivers in the Pantanal wetland
Source: Copernicus journal article supplement (doi:10.5194/bg-23-565-2026), 2026-01-21
Supplement: Supplementary file [file bg-23-565-2026-supplement-title-page.pdf › bg-23-565-2026-supplement-title-page.pdf]

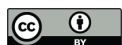

## *Supplement of*

# **Multi-scale dynamics of carbon dioxide flux and its environmental drivers in the Pantanal wetland**

**Tarcis A. O. dos Santos et al.**

*Correspondence to:* Tarcis A. O. dos Santos ([tarcis@unemat.br](mailto:tarcis@unemat.br))

- [bg-23-565-2026-supplement-title-page.pdf](#)
- [DCCA\\_hfXrgf.dat](#)
- [DCCA\\_hfXrhf.dat](#)
- [DCCA\\_hfXtairf.dat](#)
- [DCCA\\_hfXtsoilf.dat](#)
- [DCCA\\_hfXvpdf.dat](#)
- [DCCA\\_lefXhf.dat](#)
- [DCCA\\_lefXneef.dat](#)
- [DCCA\\_neefXhf.dat](#)
- [DCCA\\_neefXrgf.dat](#)
- [DCCA\\_neefXrhf.dat](#)
- [DCCA\\_neefXtairf.dat](#)
- [DCCA\\_neefXtsoilf.dat](#)
- [DCCA\\_neefXvpdf.dat](#)
- [DCCA\\_rgfXrhf.dat](#)
- [DCCA\\_rgfXtairf.dat](#)
- [DCCA\\_rgfXtsoilf.dat](#)
- [DCCA\\_rgfXvpdf.dat](#)
- [DCCA\\_rhfXtairf.dat](#)
- [DCCA\\_rhfXtsoilf.dat](#)

- DCCA\_rhfXvpdf.dat
- DCCA\_tairfXtsoilf.dat
- DCCA\_tairfXvpdf.dat
- DCCA\_tsoilfXvpdf.dat
- DFA\_hf.dat
- DFA\_neef.dat
- DFA\_neef.txt
- DFA\_rgf.dat
- DFA\_rhf.dat
- DFA\_tairf.dat
- DFA\_tsoilf.dat
- DFA\_vpdlf.dat
- dcca\_lefXrgf.dat
- dcca\_lefXrhf.dat
- dcca\_lefXtairf.dat
- dcca\_lefXtsoilf.dat
- dcca\_lefXvpdf.dat
- dfa\_lef.dat
- hf.txt
- lef.txt
- neef.txt
- rgf.txt
- rhf.txt
- rho\_hfXlef.dat
- rho\_hfXrgf.dat
- rho\_hfXrhf.dat
- rho\_hfXtairf.dat
- rho\_hfXtsoilf.dat
- rho\_hfXvpdf.dat
- rho\_lefXhf.dat
- rho\_lefXneef.dat
- rho\_lefXrgf.dat
- rho\_lefXrhf.dat

- rho\_lefXtairf.dat
- rho\_lefXtsoilf.dat
- rho\_lefXvpdf.dat
- rho\_neefXrgf.dat
- rho\_neefXrhf.dat
- rho\_neefXtairf.dat
- rho\_neefXtsoilf.dat
- rho\_neefXvpdf.dat
- rho\_neefxhf.dat
- rho\_rgfXrhf.dat
- rho\_rgfXtairf.dat
- rho\_rgfXtsoilf.dat
- rho\_rgfXvpdf.dat
- rho\_rhfXtairf.dat
- rho\_rhfXtsoilf.dat
- rho\_rhfXvpdf.dat
- rho\_tairfXtsoilf.dat
- rho\_tairfXvpdf.dat
- rho\_tsoilfXvpdf.dat
- tairf.txt
- tsoilf.txt
- vpdf.txt

The copyright of individual parts of the supplement might differ from the article licence.
